# Supplementary material for: Critical influence of the thymus on peripheral T cell homeostasis
Source: PubMed Central journal article supplement (PMC5134722; doi:10.1002/iid3.132), 2016-11-28

# Supporting Figure 1

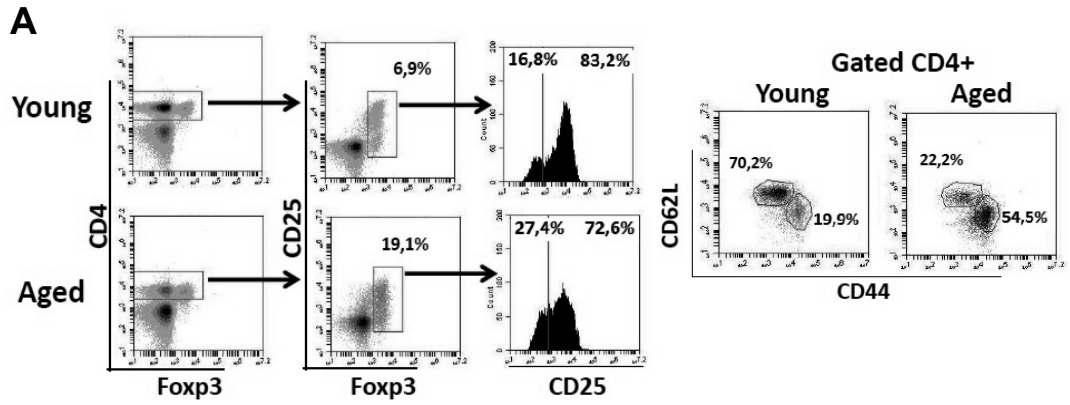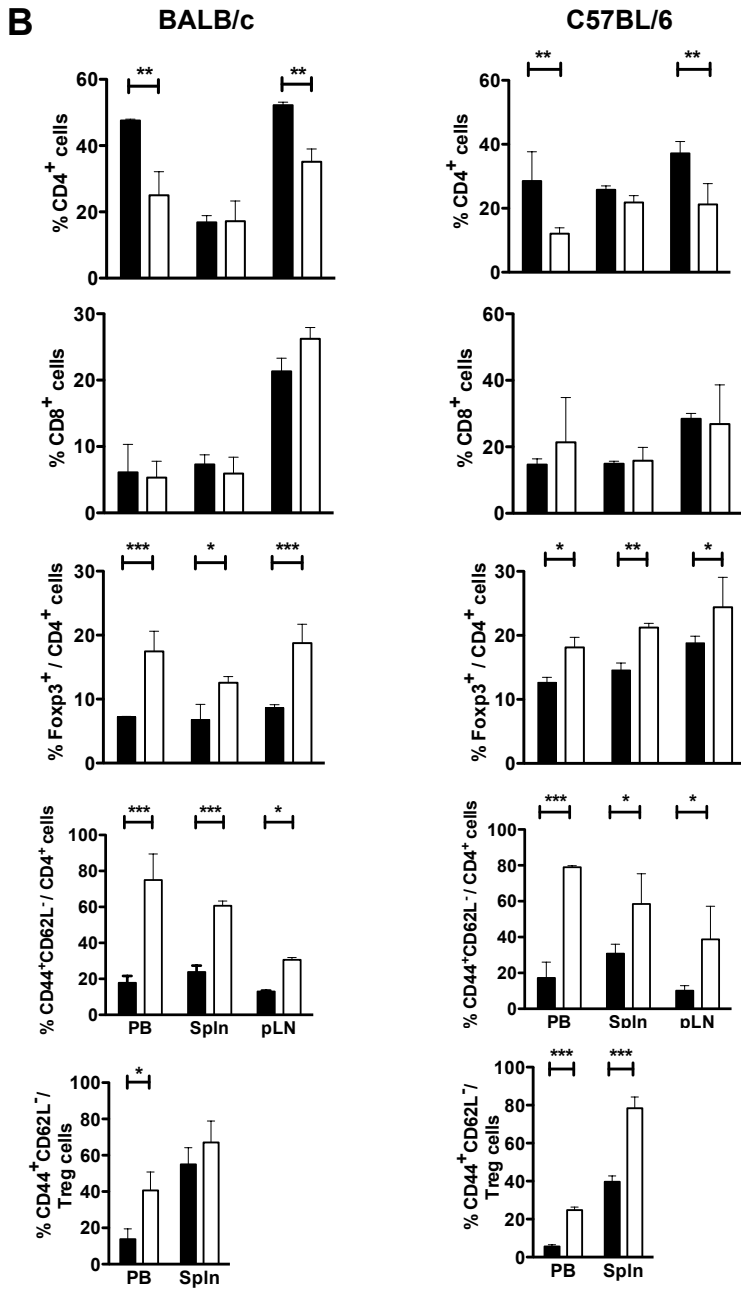

## Supporting Figure 2

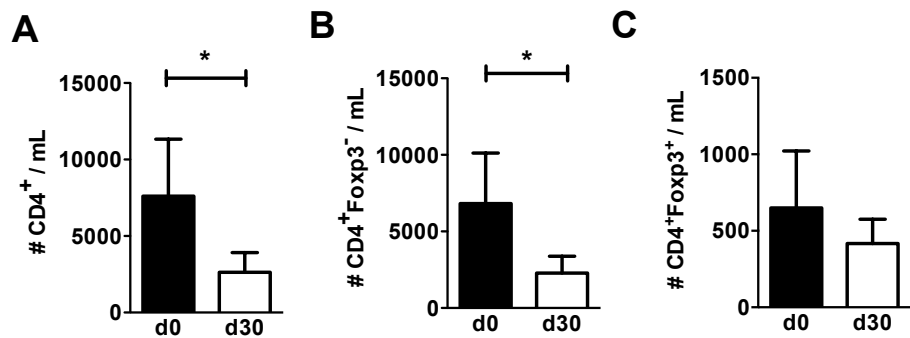

### Supporting Figure 3

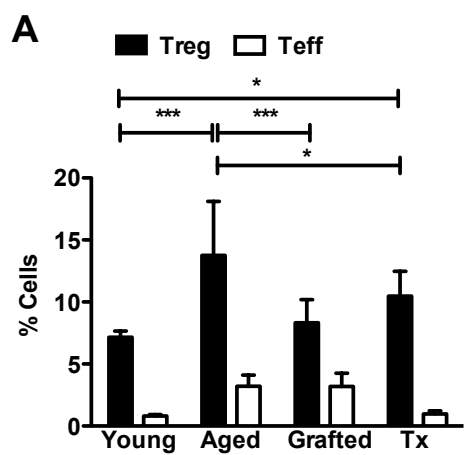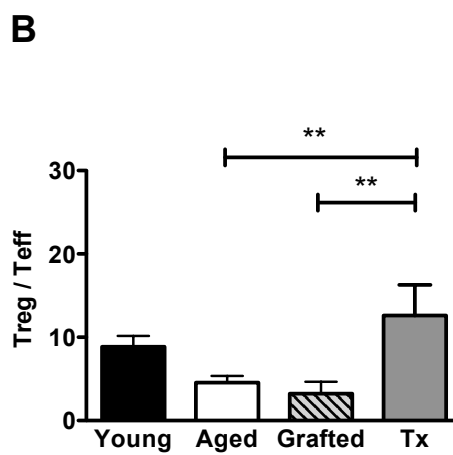

Supplement: IID3-4-474-s001.pdf [file IID3-4-474-s001.pdf]
