# Supplementary material for: Critical influence of the thymus on peripheral T cell homeostasis
Source: PubMed Central journal article supplement (PMC5134722; doi:10.1002/iid3.132), 2016-11-28
Supplement: IID3-4-474-s002.pdf [file IID3-4-474-s002.pdf]

## **Critical influence of the thymus on peripheral T cell homeostasis**

Pedro Henrique Oliveira Vianna<sup>1,2</sup>, Fábio Barrozo do Canto<sup>1,2</sup>, Jeane de Souza Nogueira<sup>1,2</sup>, Caroline Fraga Cabral Gomes Nunes<sup>1,2</sup>, Adriana César Bonomo<sup>3</sup>,  
Rita Fucs<sup>2</sup>

<sup>1</sup>*Departamento de Imunologia, Instituto de Microbiologia Paulo de Goés (IMPG) – Universidade Federal do Rio de Janeiro, Rio de Janeiro - RJ, Brazil.* <sup>2</sup>*Departamento de Imunobiologia, Instituto de Biologia – Universidade Federal Fluminense, Niterói - RJ, Brazil.* <sup>3</sup>*Programa FIOCRUCER, VPPLR – Instituto Oswaldo Cruz - FIOCRUZ, Rio de Janeiro - RJ, Brazil*

### **Supporting Information**

**Figure S1: Peripheral frequencies of CD4<sup>+</sup>, Foxp3<sup>+</sup>/CD4<sup>+</sup> and activated T cells are altered in aged mice.** Frequencies of CD4<sup>+</sup>, CD8<sup>+</sup>, Foxp3<sup>+</sup>/CD4<sup>+</sup> and CD62L<sup>-</sup>CD44<sup>+</sup>/CD4<sup>+</sup> T cells were determined, by flow cytometry, in the blood, spleen and peripheral lymph nodes of young (2-3 months-old) and aged (>18 months-old) mice. (A) Representative dot-plots show the gating strategy. Scatter-plot graphs depict the percentages of peripheral populations in (B) BALB/c mice (n=6) and (C) C57BL/6 mice (n=6). Data are from three independent experiments and statistical significance was determined by Two-way ANOVA with Bonferroni's Multiple Comparison Test (B) (\*p<0.05, \*\*p<0,01\*\*\*p<0,001).

**Figure S2: Absolute numbers of CD4<sup>+</sup> T cells are decreased, while CD4<sup>+</sup>Foxp3<sup>+</sup> Treg cells are unchanged, in the blood of thymectomized mice.** Absolute numbers of CD4<sup>+</sup>, CD4<sup>+</sup>Foxp3<sup>+</sup> and CD4<sup>+</sup>Foxp3<sup>-</sup> cells were determined by flow-cytometry. Column bar graphs show the number of (A) CD4<sup>+</sup>, (B) CD4<sup>+</sup>Foxp3<sup>-</sup> and (C) CD4<sup>+</sup>Foxp3<sup>+</sup> cells in blood samples of young mice 30 days after thymectomy (Tx, n=4). Data are from one experiment and statistical significance was determined by unpaired Student's t test (B and C) (\*p<0.05, \*\*p<0,01\*\*\*p<0,001).

**Figure S3: The frequency of CD4<sup>+</sup>CD25<sup>+</sup>Foxp3<sup>-</sup> effector T cells is also increased in aged mice and the Treg/Teff cell ratio is not altered.** (A) Column bars show the the percentage of Treg (CD4<sup>+</sup>CD25<sup>+</sup>Foxp3<sup>+</sup>) and Teff (CD4<sup>+</sup>CD25<sup>+</sup>Foxp3<sup>-</sup>) determined by flow-cytometry in the blood of young mice (2 months-old, n=4), aged mice (18 months old, n=4), aged mice 30 days after grafting with an young thymus (Grafted, n=4) and young mice 30 days after thymectomy (Tx, n=4). (B) Column bars show the ratio Treg/Teff among CD4<sup>+</sup> Tcells in each group. Data are pooled from two independent experiments and statistical significance was determined by Two-way ANOVA with Bonferroni's Multiple Comparison Test (A) and One-way ANOVA with Bonferroni's Multiple Comparison Test t (B) (\*p<0.05, \*\*p<0,01\*\*\*p<0,001).
